# Supplementary material for: The Epigenomic Features and Potential Functions of PEG- and PDS-Favorable DNA G-Quadruplexes in Rice
Source: MDPI journal article supplement (doi:10.3390/ijms25010634), 2024-01-04
Supplement: s1 [file s1]

**Spearman Correlation of Read Counts**

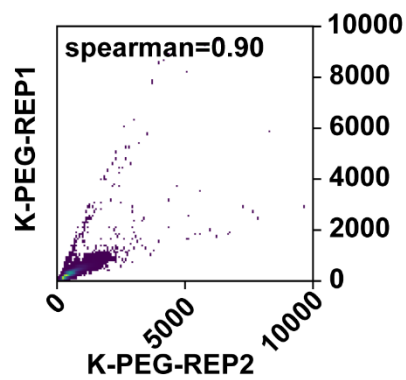

**Spearman Correlation of Read Counts**

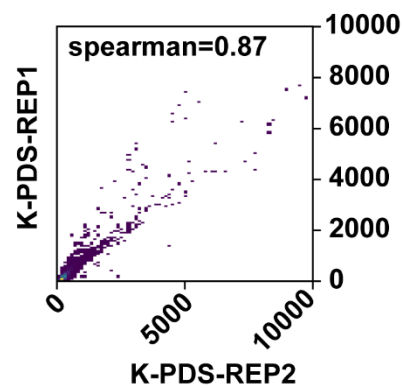

**Figure S1.** Correlation analyses of biological replicates of BG4-DNA-IP-seq data sets in the presence of PEG/PDS conditions.

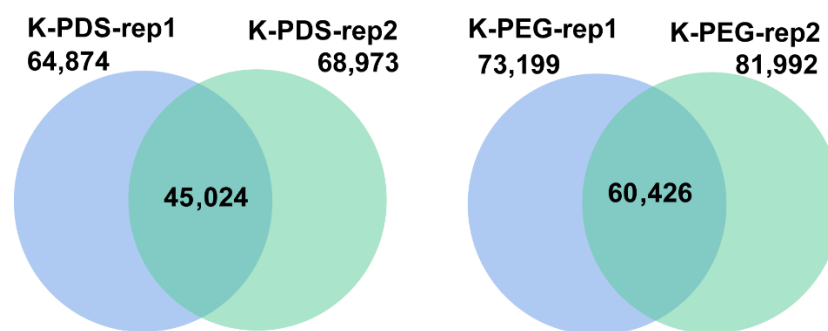

**Figure S2.** Venn diagrams showing overlaps of IP-G4 peaks between two biological replicates under PEG or PDS conditions, respectively.

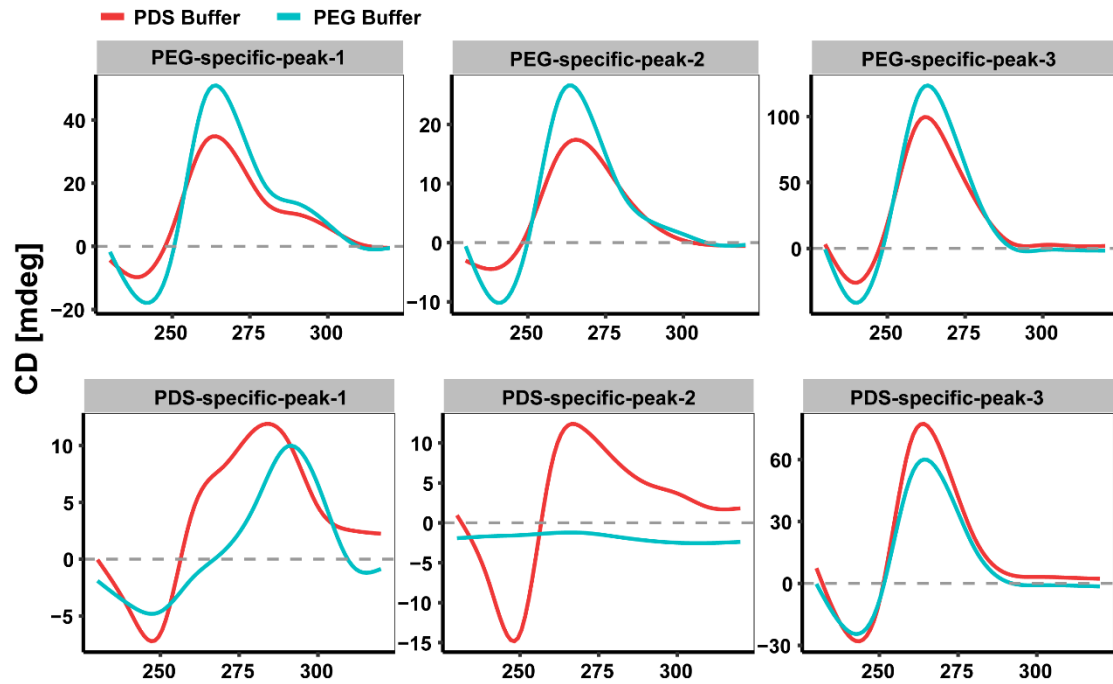

**Figure S3. Circular dichroism (CD) spectroscopy assays.** Synthesized oligoes corresponding to PEG (top) /PDS (bottom) -specific IP-G4s, reconstructed in both PEG (blue) and PDS (red) specific buffer, respectively for CD assay.

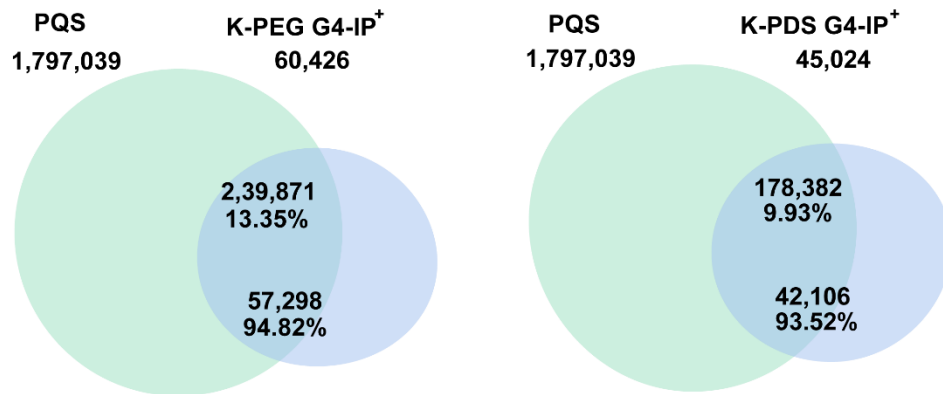

**Figure S4.** Association analyses of IP-G4s detected under PEG and PDS conditions with predicted PQFSs.

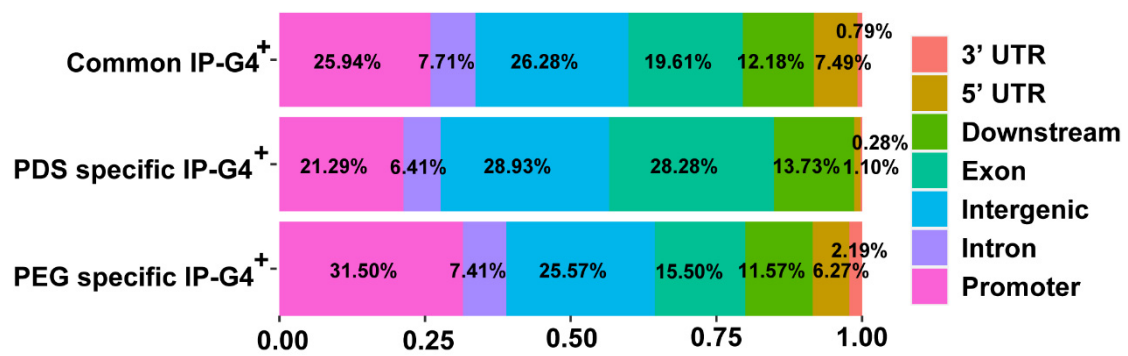

**Figure S5** Distributions of three subtypes of IP-G4s peaks (common, PEG/PDS-specific ones) across the rice genome.

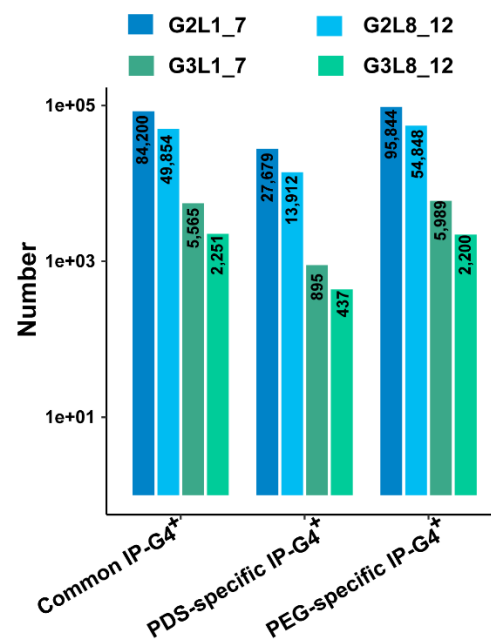

**Figure S6.** The number of each subtype of PQSs as indicated in PDS-/PEG-specific and common IP-G4s.

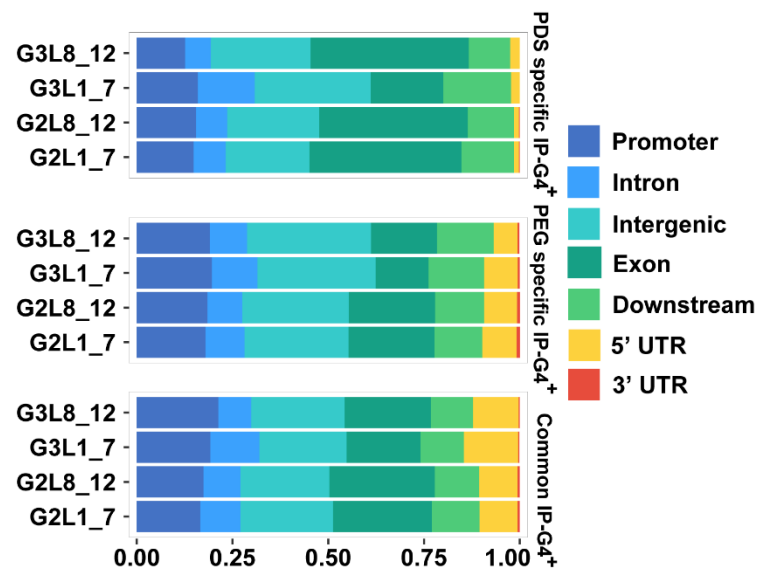

**Figure S7.** Distributions of subtypes of PQFSs corresponding to PDS-/PEG-specific and common IP-G4s, respectively, in each subgenomic region as indicated.

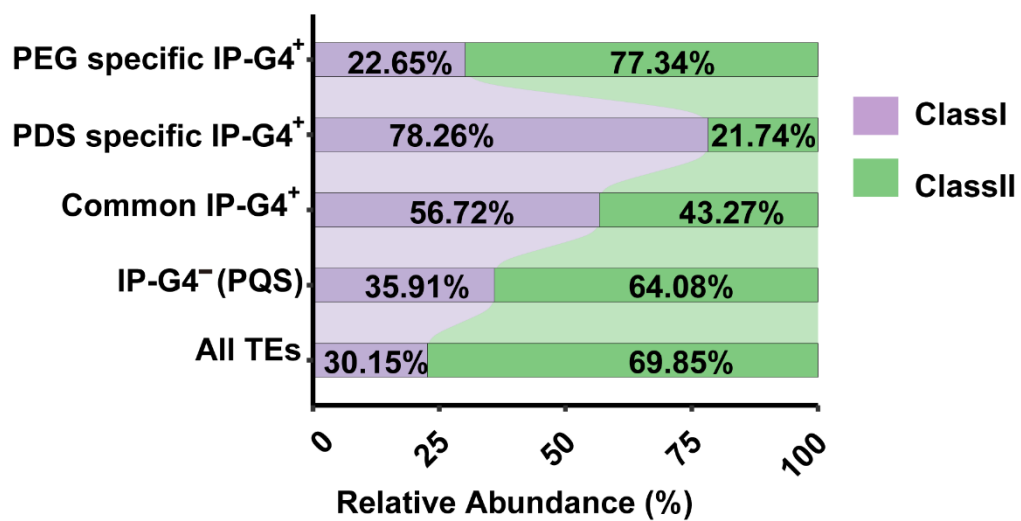

**Figure S8.** Distributions of PDS-/PEG-specific and common IP-G4<sup>+</sup> (PQFSs), and IP-G4<sup>-</sup> (PQS) within class I and class II TEs.

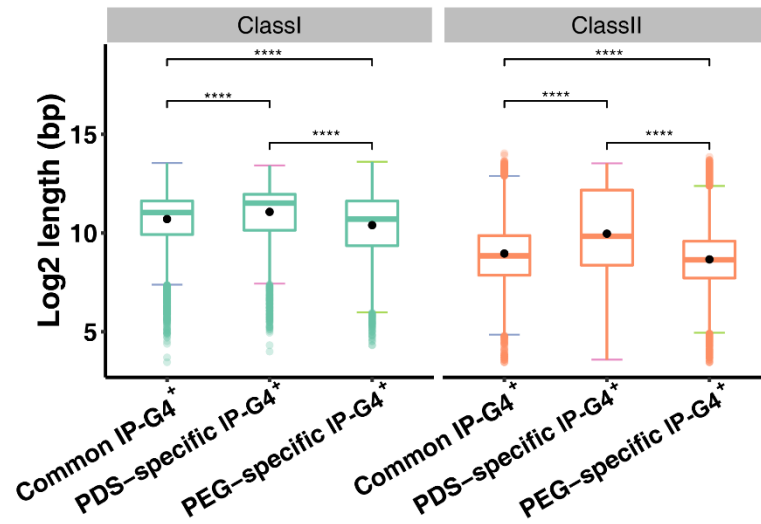

**Figure S9.** The length of Class I and II TEs associated with each subtype of IP-G4<sup>+</sup> as indicated.

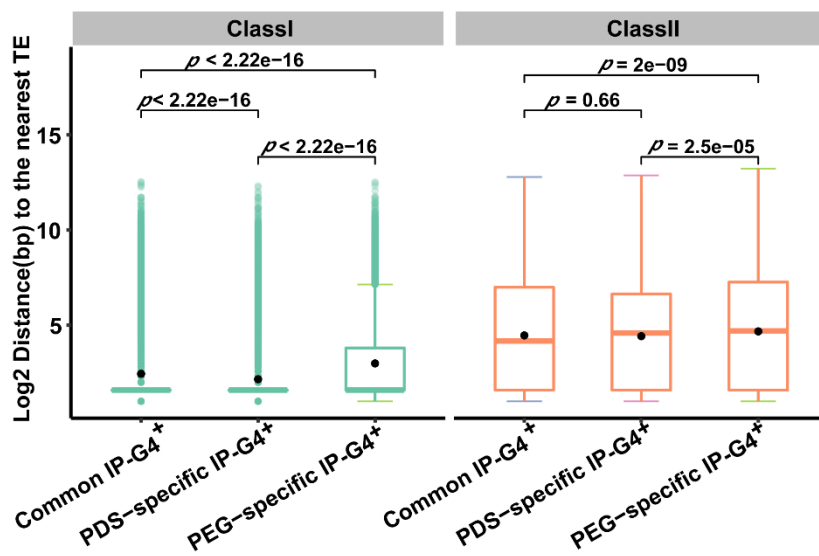

**Figure S10** The distance of Class I and II TEs associated with each subtype of IP-G4<sup>+</sup> as indicated to the nearest TEs.

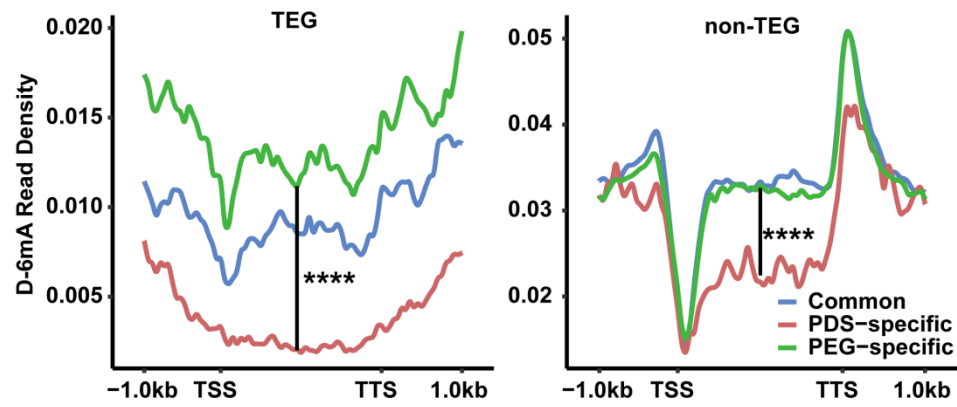

**Figure S11.** DNA-6mA methylation levels in non-TEGs and TEGs associated with PDS-/PEG-specific and common IP-G4<sup>+</sup>. Read density of DNA 6mA was plotted across 1 kb upstream of TSSs to 1 kb downstream of TTSSs of genes.

**Table S1.** Summary of sequencing data used in this study.

| Samples    | Clean reads | Mapping reads | Mapping ratio | Unique reads | Peaks  |
|------------|-------------|---------------|---------------|--------------|--------|
| K-PDS-REP1 | 146,010,703 | 64,365,431    | 44.08%        | 14,338,375   | 64,874 |
| K-PDS-REP2 | 159,213,960 | 69,531,988    | 43.67%        | 17,716,417   | 68,973 |
| K-PEG-REP1 | 55,500,244  | 45,680,377    | 82.31%        | 21,134,465   | 73,199 |
| K-PEG-REP2 | 80,690,945  | 71,857,860    | 89.05%        | 37,099,992   | 81,992 |

**Table S2.** Summary of published data sets used in this study.

| Data              | Accession number | References                |
|-------------------|------------------|---------------------------|
| DNase-seq         | GSE26734         | Zhang et al. 2012         |
| DRIP-seq          | GSE111944        | Fang et al. 2019          |
| BS-Seq            | SRP238686        | Zhao L et al.2020         |
| DNA-6mA IP-seq    | GSE103145        | Zhou et al. 2018          |
| RNA-seq           | GSE33265         | Wu et al. 2011            |
| MNase-seq         | SRP045236        | Zhang et al. 2016         |
| H3K4me3-ChIP-seq  | GSE19602         | Vaquero-Sedas et al. 2012 |
| H3K36me3-ChIP-seq | GSE26733         | Zhang et al. 2012         |
| H3K4me2-ChIP-seq  | GSE26733         | Zhang et al. 2012         |
| H4K12ac-ChIP-seq  | GSE26733         | Zhang et al. 2012         |
| H3K9ac-ChIP-seq   | GSE79033         | Fang et al. 2016          |
| H3K27ac-ChIP-seq  | GSE79033         | Fang et al. 2016          |
| H3K4ac-ChIP-seq   | GSE79033         | Fang et al. 2016          |
| H3K9me1-ChIP-seq  | GSE79033         | Fang et al. 2016          |
| H3K27me3-ChIP-seq | GSE79033         | Fang et al. 2016          |
| H3K9me3-ChIP-seq  | GSE79033         | Fang et al. 2016          |
| H4K16ac-ChIP-seq  | GSE69426         | Lu et al. 2015            |
| H3K23ac-ChIP-seq  | GSE69426         | Lu et al. 2015            |
| H3K9me2-ChIP-seq  | GSE81436         | Tan et al. 2016           |
| H3K4me1-ChIP-seq  | SRP238435        | Zhao et al. 2020          |

**Table S3.** Synthesized DNA oligoes used in this research.

| Name                | Sequence (5' to 3')                   |
|---------------------|---------------------------------------|
| PEG-specific-peak-1 | GTAGGGGCGGCGGCGAGGGGCGGCGG            |
| PEG-specific-peak-2 | CGAAGGAGGGGGAAGGCCT                   |
| PEG-specific-peak-3 | AGGCGGGGGGGGGGGGGGGGGGGGCAAG          |
| PDS-specific-peak-1 | TGGCACGGCGGCCGAATG                    |
| PDS-specific-peak-2 | AGGTTTCATATGGAGCTGGTGCTAGAGCCATATAGGC |
| PDS-specific-peak-3 | AGGGGGGTACAAGGGGATAATAATATAGGGGT      |
